# Supplementary material for: A Genome-Wide Scan Identifies Variants in NFIB Associated with Metastasis in Patients with Osteosarcoma
Source: Oxford University Press journal article supplement (doi:10.1158/2159-8290.cd-15-0125), 2015-06-17
Supplement: 21598290cd150125-sup-144569_2_supp_3004114_npbv44.xlsx [file 21598290cd150125-sup-144569_2_supp_3004114_npbv44.xlsx]

## Sheet: new_SupTable2
Supplemental Table 2. Relationship of variables to metastasis at diagnosis in the discovery set.
Variablee		Metastasis at diagnosis		P-value
		No	Yes
Age at diagnosis, median (IQR)		15 (7)	15 (6)	0.292a
Gender	Male	238 (56.8%)	67 (54.9%)
	Female	181 (43.2%)	55 (45.1%)	0.712b
Percent necrosis	>90%	108 (44.8%)	18 (42.9%)
	<90%	133 (55.2%)	24 (57.1%)	0.814b
Vital Statusd	Alive	310 (76.7%)	45 (37.5%)
	Deceased	94 (23.3%)	75 (62.5%)	1.9x10-19 c
Tumor location	Lower long bones	339 (81.3%)	98 (80.3%)
	Upper long bones	52 (12.5%)	11 (9.0%)
	Lower short bones	8 (1.9%)	0 (0)
	Pelvic region	8 (1.9%)	8 (6.6%)
	Chest region	4 (1.0%)	3 (2.5%)
	Face or skull	2 (0.5%)	1 (0.8%)
	Upper short bones	2 (0.5%)	1 (0.8%)
	Vertebral column	2 (0.5%)	0 (0)	0.099b
Tumor Subtype	Osteoblastic	98 (47.6%)	30 (68.2%)
	Chondroblastic	26 (12.6%)	4 (9.1%)
	High grade	24 (11.7%)	4 (9.1%)
	Mixed	19 (9.2%)	2 (4.5%)
	Fibroblastic	15 (7.3%)	0 (0)
	Telangiectasic	10 (4.9%)	1 (2.3%)
	Parosteal	6 (2.9%)	1 (2.3%)
	Conventional	2 (1.0%)	0 (0)
	Periosteal	2 (1.0%)	0 (0)
	Low Grade Central with High Grade component	1 (0.5%)	0 (0)
	Small Cell	1 (0.5%)	0 (0)
	Soft Tissue	1 (0.5%)	0 (0)
	Surface Low Grade	1 (0.5%)	0 (0)
	Pagetic	0 (0)	2 (4.5%)	0.111b
Total		419 (77.4%)	122 (22.6%)
IQR, interquartile range.
a Mann-Whitney U test for the difference in the distribution of age between cases with and without metastasis;
b Chi-squared test;
c Cox regression model for survival adjusted for study population and age;
d Based on the presence of a death date or last known alive date;
e Not all cases had complete variable information.
