# Supplementary material for: A Genome-Wide Scan Identifies Variants in NFIB Associated with Metastasis in Patients with Osteosarcoma
Source: Oxford University Press journal article supplement (doi:10.1158/2159-8290.cd-15-0125), 2015-06-17
Supplement: 21598290cd150125-sup-144569_2_supp_3004115_npbv34.xlsx [file 21598290cd150125-sup-144569_2_supp_3004115_npbv34.xlsx]

## Sheet: S table 3
Supplemental Table 3. Top 30 loci associated with metastasis at diagnosis in the discovery set of 541 European osteosarcoma cases.
Chr: Positiona		dbSNP locus	EA	Gene neighborhood		P value	OR	(95% CI)
9	14181653	rs2890982	T	NFIB	intronic	4.36e-07	2.686	1.831	3.94
9	14200005	rs10810113	T	NFIB	intronic	1.37e-06	2.919	1.89	4.509
9	14171645	rs12377502	G	NFIB	intronic	1.64e-06	2.675	1.789	4.001
9	14196340	rs2382454	T	NFIB	intronic	2.32e-06	2.55	1.729	3.761
5	145795417	rs2116800	A	8.5kb 3' of CTB-1H10.1		7.35e-06	0.4902	0.3589	0.6695
9	14197498	rs10738355	A	NFIB	intronic	7.54e-06	2.436	1.65	3.597
9	14199422	rs10810110	G	NFIB	intronic	7.88e-06	2.477	1.664	3.687
16	86377744	rs12919400	C	AC092327.1	intronic	1.28e-05	3.678	2.049	6.603
7	15125363	rs12112796	T	17kb 3' of AC006458.3		1.39e-05	3.787	2.077	6.906
15	74331211	rs1550434	T	PML	intronic	1.84e-05	1.996	1.455	2.739
9	85989187	rs4877757	G	FRMD3	intronic	2.11e-05	0.4569	0.3185	0.6555
10	16945193	rs7099855	C	CUBN	intronic	2.2e-05	4.327	2.2	8.512
8	134076725	rs2741205	A	TG	intronic	3.33e-05	1.937	1.418	2.648
10	12640797	rs7911208	T	CAMK1D	intronic	5.07e-05	1.924	1.402	2.64
15	33356715	rs12904922	A	FMN1	intronic	5.09e-05	2.115	1.472	3.038
2	216023682	rs7419736	A	21kb 5' of ABCA12		5.3e-05	2.434	1.581	3.747
1	181039528	rs17302632	T	8.5kb 3' of MR1		5.47e-05	3.1	1.789	5.372
1	206840403	rs17041922	G	DYRK3		5.84e-05	2.137	1.475	3.094
4	16590588	rs11945652	A	LDB2	intronic	6.38e-05	1.926	1.397	2.655
4	125515296	rs12649449	T	36kb 5' of RP11-93I21.3		6.38e-05	3.102	1.781	5.404
2	3100883	rs992907	G	AC019118.2		6.47e-05	0.5197	0.3769	0.7165
7	15121951	rs4598156	C	14kb 3' of AC006458.3		6.53e-05	3.575	1.913	6.68
16	84208032	rs3803643	C	DNAAF1	intronic	6.83e-05	0.5343	0.3925	0.7274
10	16972011	rs10904838	G	CUBN	intronic	7.21e-05	3.857	1.98	7.512
7	15073547	rs720872	C	32kb 5' of AC006458.3		7.59e-05	3.444	1.867	6.354
6	24568452	rs12213545	T	KIAA0319	intronic	8.93e-05	2.518	1.587	3.997
1	56666809	rs778432	A	46kb 3' of RP1-158P9.1		8.97e-05	1.965	1.402	2.756
1	56689034	rs706371	C	25kb 3' of RP11-504A18.1		9.2e-05	1.955	1.397	2.737
16	86391038	rs16940957	C	12kb 5' of AC092327.1		9.61e-05	2.762	1.658	4.603
1	184888653	rs234680	A	FAM129A	intronic	9.67e-05	3.322	1.817	6.075
a Chromosome, build 36 position; EA, effect allele; OR, odds ratio adjusted for study; CI, confidence interval
