# Supplementary material for: A Genome-Wide Scan Identifies Variants in NFIB Associated with Metastasis in Patients with Osteosarcoma
Source: Oxford University Press journal article supplement (doi:10.1158/2159-8290.cd-15-0125), 2015-06-17
Supplement: 21598290cd150125-sup-144569_2_supp_3004118_npbv34.xlsx [file 21598290cd150125-sup-144569_2_supp_3004118_npbv34.xlsx]

## Sheet: new S Table 6 (mod)
Supplemental Table 6. SNPs in the NFIB locus associated with metastasis at diagnosis with P≤1x10-5 in the discovery stage, and functionally annotated with information from the ENCODE and 1000 Genomes Project data.
Chr	Position (hg19)	dbSNP locus	Ref	Alt	OR	95% CI		P value	Cases without mets.	Cases with mets.	Cancer-free controls	D'	R2	1000Genomes				RegulomeDB	Promoter histone marks	Enhancer histone marks	DNAse HS	Proteins bound	Regulatory motifs changed	RefSeq genes	dbSNP location
						Lower	Upper		EAF	EAF	EAF			EUR, freq	AFR, freq	AMR, freq	ASN, freq
9	14194376	rs4551459	C	T	2.833	1.915	4.192	1.87e-07	0.1038	0.2377	0.1501	1	0.814329	0.133	0.452	0.18	0.369	5	VAS	8 organs	MUS,VAS		5 altered motifs	NFIB	intronic
9	14175165	rs200312595	T	TC	2.884	1.927	4.316	2.6e-07	0.1005	0.2254	0.1459	0.9	0.68	0.12	0.38	0.2	0.38	NA					7 altered motifs	NFIB	intronic
9	14187655	rs2382448	G	A	2.836	1.904	4.224	2.92e-07	0.1038	0.2336	0.1454	1	0.887287	0.135	0.396	0.166	0.394	5		10 organs	LNG,MUS		10 altered motifs	NFIB	intronic
9	14175329	rs12552956	C	T	2.862	1.913	4.28	3.08e-07	0.1014	0.2254	0.1474	1	0.743048	0.131	0.182	0.189	0.392	7					CACD,NRSF,Rad21	NFIB	intronic
9	14190287	rs7034162	T	A	2.754	1.863	4.071	3.78e-07	0.111	0.2418	0.1528	1	1	0.144	0.331	0.172	0.392	5		5 organs		GATA2	Cdc5,HDAC2,OTX	NFIB	intronic
9	14185313	rs6474822	T	A	2.762	1.859	4.103	4.9e-07	0.1038	0.2295	0.1504	1	0.778482	0.135	0.393	0.203	0.408	6						NFIB	intronic
9	14163888	rs13299433	C	T	2.729	1.845	4.037	4.98e-07	0.1062	0.2336	0.1536	1	0.743048	0.144	0.206	0.218	0.388	6		BRST			21 altered motifs	NFIB	intronic
9	14163950	rs28546939	G	A	2.729	1.845	4.037	4.98e-07	0.1062	0.2336	0.1536	1	0.743048	0.144	0.206	0.218	0.388	7		BRST			4 altered motifs	NFIB	intronic
9	14184904	rs10756535	A	C	2.882	1.905	4.359	5.43e-07	0.09189	0.209	0.136	-1	0.778482	0.115	0.006	0.115	0.326	6					Brachyury,LUN-1,Pitx2	NFIB	intronic
9	14172712	rs10961402	T	C	2.854	1.888	4.313	6.48e-07	0.09189	0.209	0.1398	-1	0.743048	0.124	0.006	0.114	0.331	7					4 altered motifs	NFIB	intronic
9	14183860	rs9776572	C	T	2.765	1.85	4.132	6.94e-07	0.1074	0.2295	0.1481	1	0.887287	0.138	0.455	0.189	0.374	6			IPSC		Irf,STAT	NFIB	intronic
9	14183424	rs1873896	G	A	2.675	1.812	3.948	7.29e-07	0.1134	0.2418	0.1575	1	0.887287	0.148	0.384	0.202	0.383	6		IPSC, BRST, SKIN			DMRT5	NFIB	intronic
9	14186626	rs142129510	C	CCTT	2.743	1.839	4.091	7.5e-07	0.1014	0.2254	0.1413	-0.97	0.76	0.12	0.02	0.13	0.29	NA		9 organs	BRST,MUS		8 altered motifs	NFIB	intronic
9	14186625	rs201726742	A	ACCT	2.743	1.839	4.091	7.5e-07	0.1014	0.2254	0.1413	-1	0.78	0.12	0.02	0.13	0.29	NA		9 organs	BRST,MUS		8 altered motifs	NFIB	intronic
9	14185246	rs7035474	G	A	2.709	1.825	4.021	7.61e-07	0.1062	0.2295	0.1509	1	0.778482	0.134	0.312	0.215	0.408	6					6 altered motifs	NFIB	intronic
9	14181653	rs2890982	C	T	2.671	1.807	3.95	8.41e-07	0.1122	0.2377	0.1543	1	0.887287	0.146	0.263	0.213	0.378	7	9 organs	12 organs				NFIB	intronic
9	14164250	rs10961399	C	T	2.656	1.8	3.918	8.44e-07	0.1122	0.2377	0.162	0.868263	0.641247	0.152	0.205	0.225	0.388	7			LNG,MUS			NFIB	intronic
9	14190052	rs10810104	T	A	2.591	1.764	3.804	1.2e-06	0.1181	0.2459	0.1593	1	1	0.151	0.48	0.193	0.392	6			BRN		Bcl6b,TATA	NFIB	intronic
9	14188857	rs2382450	C	T	2.555	1.748	3.734	1.26e-06	0.1208	0.25	0.1636	1	0.961982	0.164	0.24	0.223	0.376	7	FAT, VAS	7 organs	HRT,MUS		Zbtb3	NFIB	intronic
9	14189225	rs74446758	G	T	2.643	1.784	3.916	1.27e-06	0.1074	0.2295	0.1496	-1	1	0.145	0.018	0.154	0.358	5		9 organs	4 organs		6 altered motifs	NFIB	intronic
9	14189552	rs78087355	C	T	2.643	1.784	3.916	1.27e-06	0.1074	0.2295	0.1496	-1	1	0.145	0.018	0.154	0.36	NA		7 organs			9 altered motifs	NFIB	intronic
9	14135093	rs12375873	A	T	2.817	1.851	4.286	1.34e-06	0.08711	0.1967	0.1278	-1	0.743048	0.121	0.004	0.085	0	7		LNG			5 altered motifs	NFIB	intronic
9	14138216	rs77408202	A	T	2.817	1.851	4.286	1.34e-06	0.08711	0.1967	0.1291	-1	0.743048	0.122	0.004	0.086	0	7					Smad3	NFIB	intronic
9	14200005	rs10810113	C	T	2.919	1.89	4.509	1.37e-06	0.09478	0.2156	0.1502	0.954399	0.741753	0.132	0.197	0.169	0.382	1f			4 organs		Foxq1	NFIB	intronic
9	14186391	rs13287487	T	C	2.557	1.745	3.747	1.48e-06	0.1205	0.25	0.1688	1	1	0.158	0.327	0.262	0.433	1d		6 organs			GR	NFIB	intronic
9	14169557	rs12376024	T	C	2.674	1.789	3.997	1.62e-06	0.09905	0.2172	0.1437	-0.912176	0.707749	0.13	0.014	0.115	0.342	6		BRST, VAS, HRT			LBP-1	NFIB	intronic
9	14171645	rs12377502	G	A	2.675	1.789	4.001	1.64e-06	0.1002	0.2172	0.1452	-1	0.778482	0.135	0.06	0.133	0.362	1f	LNG	4 organs	BRST		Dobox4,GATA,Smad	NFIB	intronic
9	14200058	rs10810114	C	T	2.744	1.815	4.148	1.71e-06	0.09427	0.2049	0.1495	0.954399	0.741753	0.133	0.197	0.169	0.382	5			HRT		En-1	NFIB	intronic
9	14203814	rs10961420	A	G	2.706	1.797	4.075	1.88e-06	0.09189	0.2049	0.1378	-1	0.743048	0.121	0.079	0.117	0.394	3a			13 organs	MAFK	YY1	NFIB	intronic
9	14195333	rs10961413	C	T	2.574	1.745	3.796	1.88e-06	0.1086	0.2295	0.15	-1	0.961982	0.141	0.034	0.154	0.365	7			HRT		5 altered motifs	NFIB	intronic
9	14204747	rs10756539	C	G	2.652	1.774	3.965	1.98e-06	0.1014	0.2172	0.1517	0.959116	0.850371	0.142	0.185	0.163	0.431	7			HRT,SKIN			NFIB	intronic
9	14199908	rs10810111	A	G	2.721	1.8	4.113	2.04e-06	0.09547	0.2049	0.1504	0.954399	0.741753	0.132	0.197	0.167	0.387	5			4 organs		Pou2f2	NFIB	intronic
9	14197958	rs2382456	C	T	2.508	1.714	3.67	2.2e-06	0.111	0.2336	0.1539	0.961754	0.924971	0.15	0.06	0.124	0.336	7		11 organs	MUS,MUS			NFIB	intronic
9	14165206	rs10961400	G	A	2.632	1.762	3.932	2.29e-06	0.1014	0.2172	0.1445	-1	0.887287	0.136	0.06	0.124	0.362	5			BRST,SKIN		4 altered motifs	NFIB	intronic
9	14196340	rs2382454	T	C	2.55	1.729	3.761	2.32e-06	0.1098	0.2295	0.1505	-1	0.961982	0.146	0.133	0.133	0.332	6		7 organs			10 altered motifs	NFIB	intronic
9	14157867	rs12685276	G	C	2.732	1.799	4.148	2.42e-06	0.0895	0.1967	0.1321	-1	0.743048	0.124	0.017	0.115	0.196	7		BRN			Ik-1,PLZF	NFIB	intronic
9	14168367	rs76317170	C	T	2.61	1.749	3.897	2.68e-06	0.1014	0.2172	0.1456	-1	0.850594	0.139	0.059	0.154	0.382	7		4 organs				NFIB	intronic
9	14197792	rs34370866	G	GA	2.474	1.692	3.617	2.98e-06	0.1122	0.2336	0.1543	0.92	0.81	0.15	0.1	0.15	0.36	NA		10 organs		MAFF	4 altered motifs	NFIB	intronic
9	14197788	rs78007311	TA	T	2.474	1.692	3.617	2.98e-06	0.1122	0.2336	0.1543	0.91	0.83	0.15	0.06	0.15	0.34	NA		10 organs		MAFF	6 altered motifs	NFIB	intronic
9	14195454	rs10810106	T	C	2.48	1.69	3.637	3.38e-06	0.1134	0.2336	0.1543	-1	0.961982	0.146	0.198	0.141	0.335	7					4 altered motifs	NFIB	intronic
9	14166469	rs59582428	C	T	2.569	1.723	3.832	3.71e-06	0.1026	0.2172	0.1471	-1	0.850594	0.141	0.105	0.164	0.383	7		LNG				NFIB	intronic
9	14185136	rs10756536	G	A	2.561	1.719	3.815	3.74e-06	0.1002	0.2131	0.1459	-1	0.778482	0.13	0.312	0.186	0.371	6					Elf5,Foxp1,Pou2f2	NFIB	intronic
9	14199909	rs10810112	C	T	2.598	1.733	3.896	3.85e-06	0.09905	0.209	0.1533	0.872968	0.676178	0.139	0.203	0.174	0.389	5			4 organs			NFIB	intronic
9	14170636	rs79715983	C	T	2.603	1.729	3.919	4.62e-06	0.09308	0.2008	0.1356	-1	0.778482	0.121	0.005	0.094	0	4	LNG	8 organs	BRST,SKIN	GR		NFIB	intronic
9	14149993	rs76457858	C	A	2.66	1.75	4.042	4.65e-06	0.0895	0.1926	0.1314	-0.952575	0.706394	0.127	0.004	0.098	0	7					AIRE	NFIB	intronic
9	14201586	rs2890985	C	T	2.54	1.702	3.791	5.09e-06	0.1026	0.2131	0.1488	1	0.961982	0.143	0.091	0.161	0.416	7		9 organs			5 altered motifs	NFIB	intronic
9	14203057	rs12235129	T	G	2.527	1.696	3.764	5.19e-06	0.1062	0.2172	0.1579	-0.961754	0.924971	0.151	0.143	0.143	0.356	6	5 organs	12 organs	5 organs		7 altered motifs	NFIB	intronic
9	14162003	rs10961396	T	C	2.602	1.72	3.937	5.94e-06	0.09189	0.1967	0.1323	-1	0.850594	0.122	0.014	0.117	0.17	6					10 altered motifs	NFIB	intronic
9	14202689	rs10738356	A	G	2.521	1.689	3.762	6e-06	0.1038	0.2131	0.1488	1	1	0.145	0.091	0.157	0.418	7					Foxl1	NFIB	intronic
9	14204010	rs10961421	G	C	2.486	1.671	3.697	6.95e-06	0.11	0.2213	0.1601	-0.885262	0.783688	0.16	0.072	0.128	0.396	5			8 organs		Foxa,Irf	NFIB	intronic
9	14197057	rs6474823	C	T	2.442	1.655	3.605	6.98e-06	0.1086	0.2213	0.1519	1	0.961982	0.144	0.054	0.122	0.342	6		7 organs	HRT		GATA,Mef2,Pou2f2	NFIB	intronic
9	14196764	rs73413827	C	A	2.442	1.655	3.605	6.98e-06	0.1086	0.2213	0.1511	-1	0.961982	0.144	0.03	0.147	0.372	6		6 organs			4 altered motifs	NFIB	intronic
9	14197498	rs10738355	G	A	2.436	1.65	3.597	7.54e-06	0.11	0.2231	0.152	1	0.961982	0.144	0.05	0.124	0.349	4			SKIN,HRT,MUS		Pbx3	NFIB	intronic
9	14199422	rs10810110	A	G	2.477	1.664	3.687	7.88e-06	0.1086	0.2172	0.1607	1	0.9629	0.149	0.092	0.137	0.415	4			20 organs	RAD21	TAL1	NFIB	intronic
9	14198371	rs2382457	T	C	2.425	1.643	3.579	8.16e-06	0.1098	0.2213	0.153	1	0.961982	0.149	0.091	0.13	0.373	5		11 organs	6 organs		8 altered motifs	NFIB	intronic
9	14198747	rs2890984	T	A	2.425	1.643	3.579	8.16e-06	0.1098	0.2213	0.1523	1	0.961982	0.148	0.1	0.13	0.37	5	6 organs	17 organs	13 organs			NFIB	intronic
9	14198644	rs4532695	C	T	2.425	1.643	3.579	8.16e-06	0.1098	0.2213	0.1526	1	0.961982	0.148	0.1	0.13	0.37	7	6 organs	17 organs	6 organs		6 altered motifs	NFIB	intronic
9	14201649	rs2382459	G	T	2.443	1.648	3.622	8.79e-06	0.1062	0.2172	0.1534	0.961754	0.924971	0.151	0.202	0.179	0.415	7		5 organs			HNF1,Hoxa5,Pax-5	NFIB	intronic
9	14197367	rs57372867	C	CACTGT	2.407	1.632	3.55	9.45e-06	0.1098	0.2213	0.1526	0.96	0.89	0.14	0.05	0.15	0.33	NA		8 organs	SKIN,HRT,MUS		Ik-2	NFIB	intronic
9	14197181	rs6474824	T	C	2.407	1.632	3.55	9.45e-06	0.1098	0.2213	0.1526	1	0.961982	0.146	0.06	0.128	0.349	1f		7 organs	HRT,MUS			NFIB	intronic
9	14201012	rs2382458	G	C	2.425	1.636	3.595	1.03e-05	0.1074	0.2172	0.1545	1	0.9629	0.156	0.202	0.182	0.383	6		10 organs			PPAR,RREB-1,STAT	NFIB	intronic
9	14189188	rs2382451	T	C	2.305	1.589	3.343	1.09e-05	0.1337	0.2541	0.1811	1	1	0.178	0.306	0.313	0.423	5	FAT	9 organs	4 organs		Nrf-2,TCF11::MafG	NFIB	intronic
Ref, reference allele; alt, alternate allele; EAF, effect (coded) allele frequency; OR, odds ratio; CI, confidence interval.
